# Supplementary material for: Human cytomegalovirus exploits STING signaling and counteracts IFN/ISG induction to facilitate infection of dendritic cells
Source: PubMed Central journal article supplement (PMC10897438; doi:10.1038/s41467-024-45614-3), 2024-02-26
Supplement: 41467_2024_45614_MOESM2_ESM.pdf [file 41467_2024_45614_MOESM2_ESM.pdf]

## **Description of Additional Supplementary Files**

**Supplementary Data 1:** List of marker genes in each cluster shown in Fig. 1f, g where the two-sided Wilcoxon rank sum test was applied. Padj is corrected for multiple testing using the approach by Benjamini and Hochberg.

**Supplementary Data 2:** Single-cell summary statistics for highly variable genes in Fig. 3b where the two-sided approximate t-test, Benjamini-Hochberg multiple testing correction was applied.

**Supplementary Data 3:** Spearman's  $\rho$  of viral genes vs. IFN- $\beta$  and IFN- $\lambda$  gene expression (together with multiple testing corrected p values estimated using the two-sided asymptotic t-test) for bystanders (B1-3 and B4) or productively infected cells (P).

**Supplementary Data 4:** Spearman's  $\rho$  of host genes vs. IFN- $\beta$  and IFN- $\lambda$  gene expression (together with multiple testing corrected p values estimated using the two-sided asymptotic t-test) for bystanders (B1-3 and B4) or productively infected cells (P).

**Supplementary Data 5:** List of pathways used in Fig. 6f and Supplementary Fig. 6f and GSVA, and FDR values used in Fig. 6f.
